# Supplementary material for: Oligoorganogermanes: Interplay between Aryl and Trimethylsilyl Substituents
Source: MDPI journal article supplement (doi:10.3390/molecules27072147), 2022-03-26
Supplement: s1 [file s1]

# Supporting Information

for

## Oligoorganogermanes: interplay between aryl and trimethylsilyl substituents

Kirill V. Zaitsev<sup>a, b, \*</sup> Yurii F. Oprunenko,<sup>a</sup> Oleg Kh. Poleshchuk,<sup>c, d</sup> Andrei V. Churakov<sup>e</sup>

<sup>a</sup> Department of Chemistry, Moscow State University, Leninskie Gory 1, 3, Moscow 119991, Russia

<sup>b</sup> A.V. Topchiev Institute of Petrochemical Synthesis, Russian Academy of Sciences, Leninskii Pr., 29, Moscow, 119991, Russia

<sup>c</sup> National Research Tomsk State University, Lenin Av., 30, Tomsk 634050, Russia

<sup>d</sup> Tomsk State Pedagogical University, Kievskaya Str., 60, Tomsk 634061, Russia

<sup>e</sup> N.S. Kurnakov Institute of General and Inorganic Chemistry, Russian Academy of Sciences, Leninsky Pr. 31, Moscow 117901, Russia

\* Corresponding author:

E-mail address: [zaitsev@org.chem.msu.ru](mailto:zaitsev@org.chem.msu.ru); fax: +7(495)939 0067; phone: +7(495)939 3887

Postal address: Department of Chemistry, M.V. Lomonosov Moscow State University, Leninskie Gory 1, Bldg 3, GSP-1, Moscow 119991, Russia

## Table of Contents

### *NMR Spectra of the Compounds Obtained*

|                                                                                                                                                                                               |    |
|-----------------------------------------------------------------------------------------------------------------------------------------------------------------------------------------------|----|
| <b>Fig. S1.</b> <sup>1</sup> H NMR spectrum of (Me <sub>3</sub> Si) <sub>3</sub> Ge-Ge(C <sub>6</sub> H <sub>4</sub> Me- <i>p</i> ) <sub>3</sub> ( <b>1</b> ) (CDCl <sub>3</sub> , RT).....   | S3 |
| <b>Fig. S2.</b> <sup>13</sup> C NMR spectrum of (Me <sub>3</sub> Si) <sub>3</sub> Ge-Ge(C <sub>6</sub> H <sub>4</sub> Me- <i>p</i> ) <sub>3</sub> ( <b>1</b> ) (CDCl <sub>3</sub> , RT).....  | S3 |
| <b>Fig. S3.</b> <sup>29</sup> Si NMR spectrum of (Me <sub>3</sub> Si) <sub>3</sub> Ge-Ge(C <sub>6</sub> H <sub>4</sub> Me- <i>p</i> ) <sub>3</sub> ( <b>1</b> ) (CDCl <sub>3</sub> , RT)..... | S4 |
| <b>Fig. S4.</b> <sup>1</sup> H NMR spectrum of (Me <sub>3</sub> Si) <sub>3</sub> Ge-Ge( <i>p</i> -C <sub>6</sub> H <sub>4</sub> F) <sub>3</sub> ( <b>2</b> ) (CDCl <sub>3</sub> , RT).....    | S4 |
| <b>Fig. S5.</b> <sup>13</sup> C NMR spectrum of (Me <sub>3</sub> Si) <sub>3</sub> Ge-Ge( <i>p</i> -C <sub>6</sub> H <sub>4</sub> F) <sub>3</sub> ( <b>2</b> ) (CDCl <sub>3</sub> , RT).....   | S5 |
| <b>Fig. S6.</b> <sup>19</sup> F NMR spectrum of (Me <sub>3</sub> Si) <sub>3</sub> Ge-Ge( <i>p</i> -C <sub>6</sub> H <sub>4</sub> F) <sub>3</sub> ( <b>2</b> ) (CDCl <sub>3</sub> , RT).....   | S5 |
| <b>Fig. S7.</b> <sup>29</sup> Si NMR spectrum of (Me <sub>3</sub> Si) <sub>3</sub> Ge-Ge( <i>p</i> -C <sub>6</sub> H <sub>4</sub> F) <sub>3</sub> ( <b>2</b> ) (CDCl <sub>3</sub> , RT).....  | S6 |
| <b>Fig. S8.</b> <sup>1</sup> H NMR spectrum of (Me <sub>3</sub> Si) <sub>3</sub> Ge-Ge(C <sub>6</sub> F <sub>5</sub> ) <sub>3</sub> ( <b>3</b> ) (CDCl <sub>3</sub> , RT).....                | S6 |
| <b>Fig. S9.</b> <sup>13</sup> C NMR spectrum of (Me <sub>3</sub> Si) <sub>3</sub> Ge-Ge(C <sub>6</sub> F <sub>5</sub> ) <sub>3</sub> ( <b>3</b> ) (CDCl <sub>3</sub> , RT).....               | S7 |
| <b>Fig. S10.</b> <sup>19</sup> F NMR spectrum of (Me <sub>3</sub> Si) <sub>3</sub> Ge-Ge(C <sub>6</sub> F <sub>5</sub> ) <sub>3</sub> ( <b>3</b> ) (CDCl <sub>3</sub> , RT) .....             | S7 |
|                                                                                                                                                                                               | S1 |

|                                                                                                                                                             |    |
|-------------------------------------------------------------------------------------------------------------------------------------------------------------|----|
| <b>Fig. S11.</b> $^{29}\text{Si}$ NMR spectrum of $(\text{Me}_3\text{Si})_3\text{Ge-Ge}(\text{C}_6\text{F}_5)_3$ ( <b>3</b> ) ( $\text{CDCl}_3$ , RT) ..... | S8 |
|-------------------------------------------------------------------------------------------------------------------------------------------------------------|----|

### ***UV/vis Absorption Spectra of the Compounds Obtained***

|                                                                                                                                                                    |    |
|--------------------------------------------------------------------------------------------------------------------------------------------------------------------|----|
| <b>Fig. S12.</b> UV/vis Absorption Spectrum of $(\text{Me}_3\text{Si})_3\text{Ge-Ge}(\text{C}_6\text{H}_4\text{Me-}p)_3$ ( <b>1</b> ) ( <i>n</i> -hexane, RT)..... | S9 |
|--------------------------------------------------------------------------------------------------------------------------------------------------------------------|----|

|                                                                                                                                                                   |     |
|-------------------------------------------------------------------------------------------------------------------------------------------------------------------|-----|
| <b>Fig. S13.</b> UV/vis Absorption Spectrum of $(\text{Me}_3\text{Si})_3\text{Ge-Ge}(p\text{-C}_6\text{H}_4\text{F})_3$ ( <b>2</b> ) ( <i>n</i> -hexane, RT)..... | S10 |
|-------------------------------------------------------------------------------------------------------------------------------------------------------------------|-----|

### ***Data of the Single Crystal X-ray Diffraction Analysis***

|                                                                                                                                                                                                                                               |     |
|-----------------------------------------------------------------------------------------------------------------------------------------------------------------------------------------------------------------------------------------------|-----|
| <b>Table S1.</b> Crystallographic data for complex $(\text{Me}_3\text{Si})_3\text{Ge-Ge}(\text{C}_6\text{H}_4\text{Me-}p)_3$ ( <b>1</b> )<br>and $(\text{Me}_3\text{Si})_3\text{Ge-Ge}(p\text{-C}_6\text{H}_4\text{F})_3$ ( <b>2</b> ). ..... | S11 |
|-----------------------------------------------------------------------------------------------------------------------------------------------------------------------------------------------------------------------------------------------|-----|

### ***Data of DFT calculations***

|                                                                                                                                                                                                                                        |     |
|----------------------------------------------------------------------------------------------------------------------------------------------------------------------------------------------------------------------------------------|-----|
| <b>Fig. S14.</b> Graphical representation of HOMO ( <b>A</b> ), HOMO-1 ( <b>B</b> ), HOMO-2 ( <b>C</b> ), LUMO ( <b>D</b> ),<br>LUMO+1 ( <b>E</b> ), LUMO+2 ( <b>F</b> ) for compound $(\text{Me}_3\text{Si})_3\text{Ge-GePh}_3$ ..... | S12 |
|----------------------------------------------------------------------------------------------------------------------------------------------------------------------------------------------------------------------------------------|-----|

## NMR Spectra of the Compounds Obtained

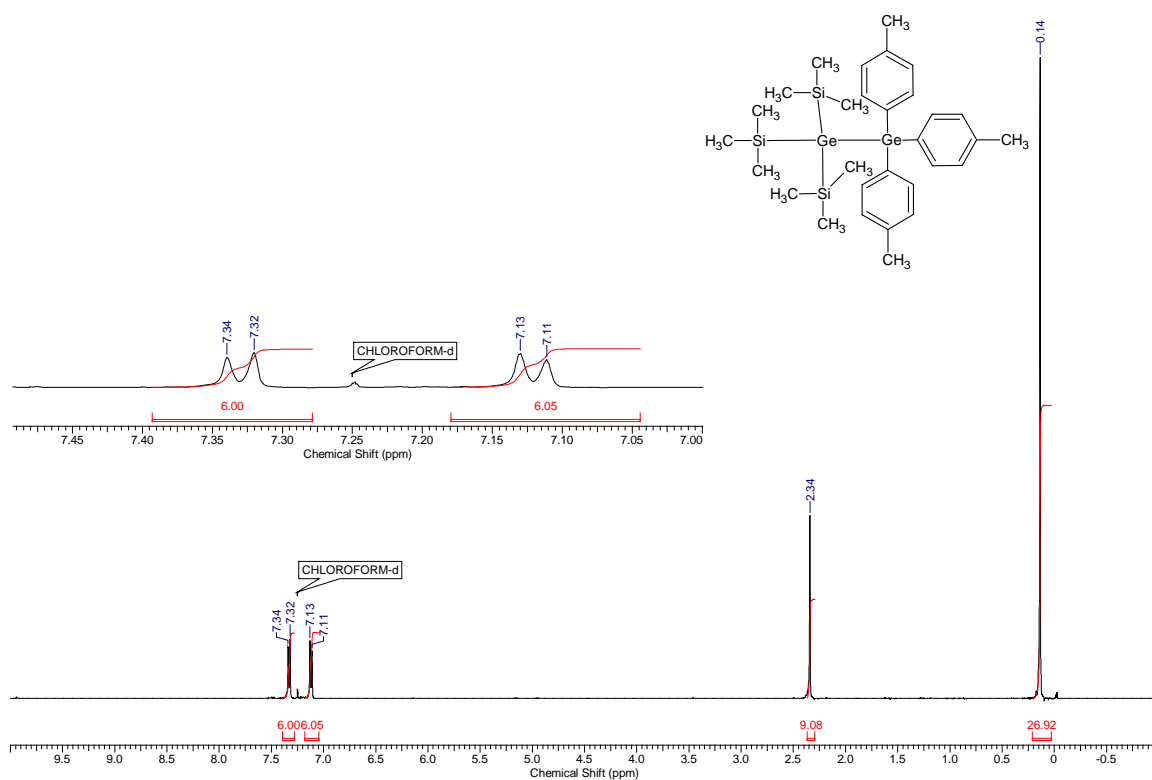

**Fig. S1.** <sup>1</sup>H NMR spectrum of  $(\text{Me}_3\text{Si})_3\text{Ge}-\text{Ge}(\text{C}_6\text{H}_4\text{Me-}p)_3$  (1) (CDCl<sub>3</sub>, RT).

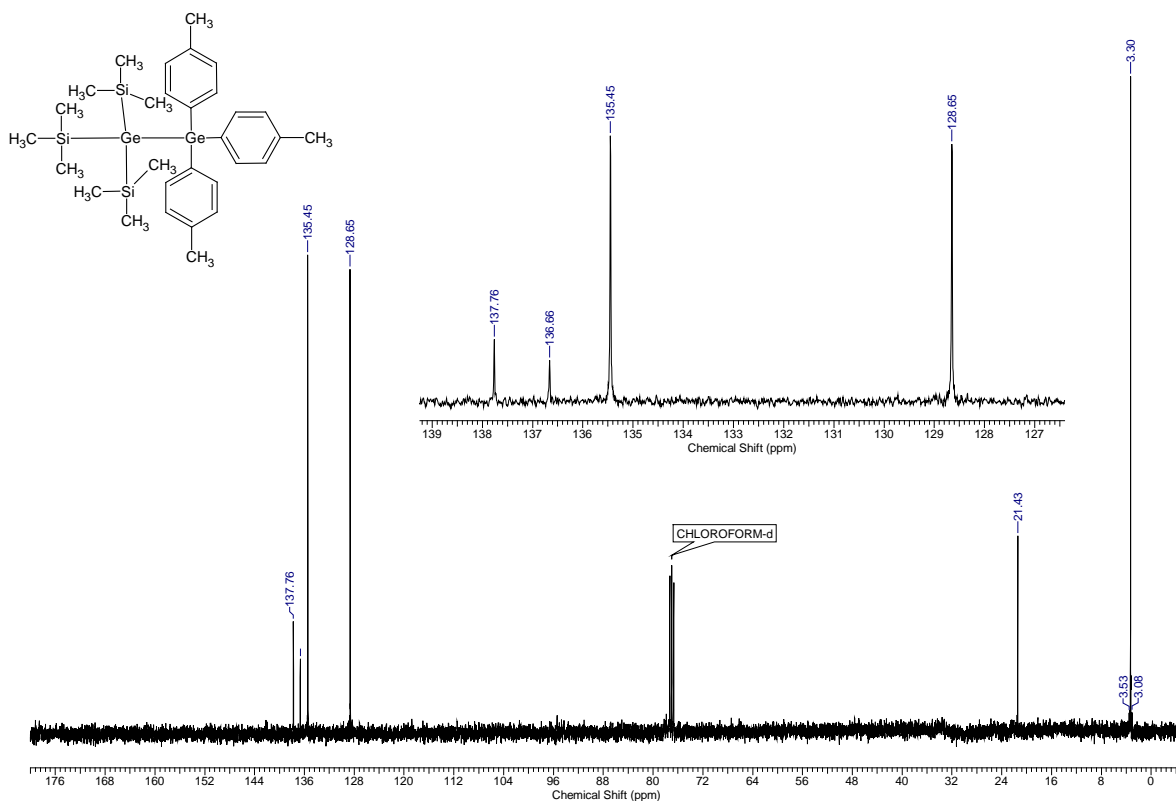

**Fig. S2.** <sup>13</sup>C NMR spectrum of  $(\text{Me}_3\text{Si})_3\text{Ge}-\text{Ge}(\text{C}_6\text{H}_4\text{Me-}p)_3$  (1) (CDCl<sub>3</sub>, RT).

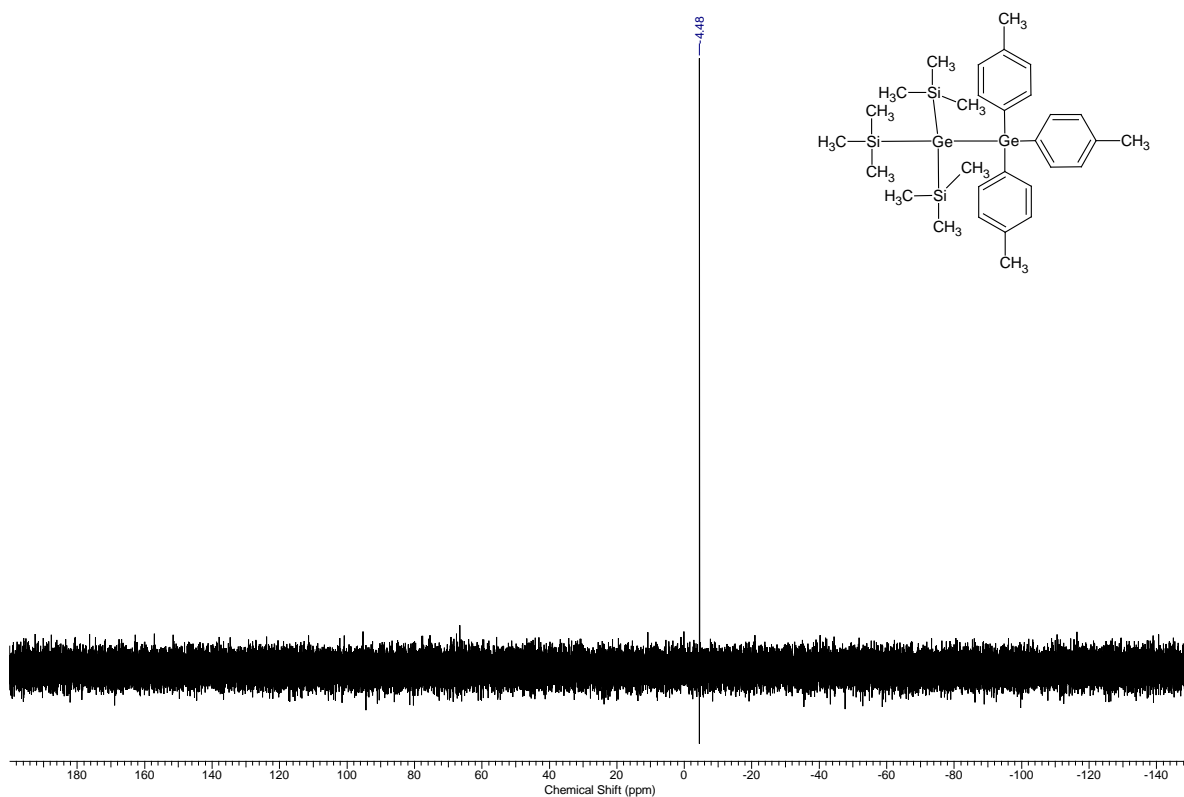

**Fig. S3.**  $^{29}\text{Si}$  NMR spectrum of  $(\text{Me}_3\text{Si})_3\text{Ge}-\text{Ge}(\text{C}_6\text{H}_4\text{Me-}p)_3$  (1) ( $\text{CDCl}_3$ , RT).

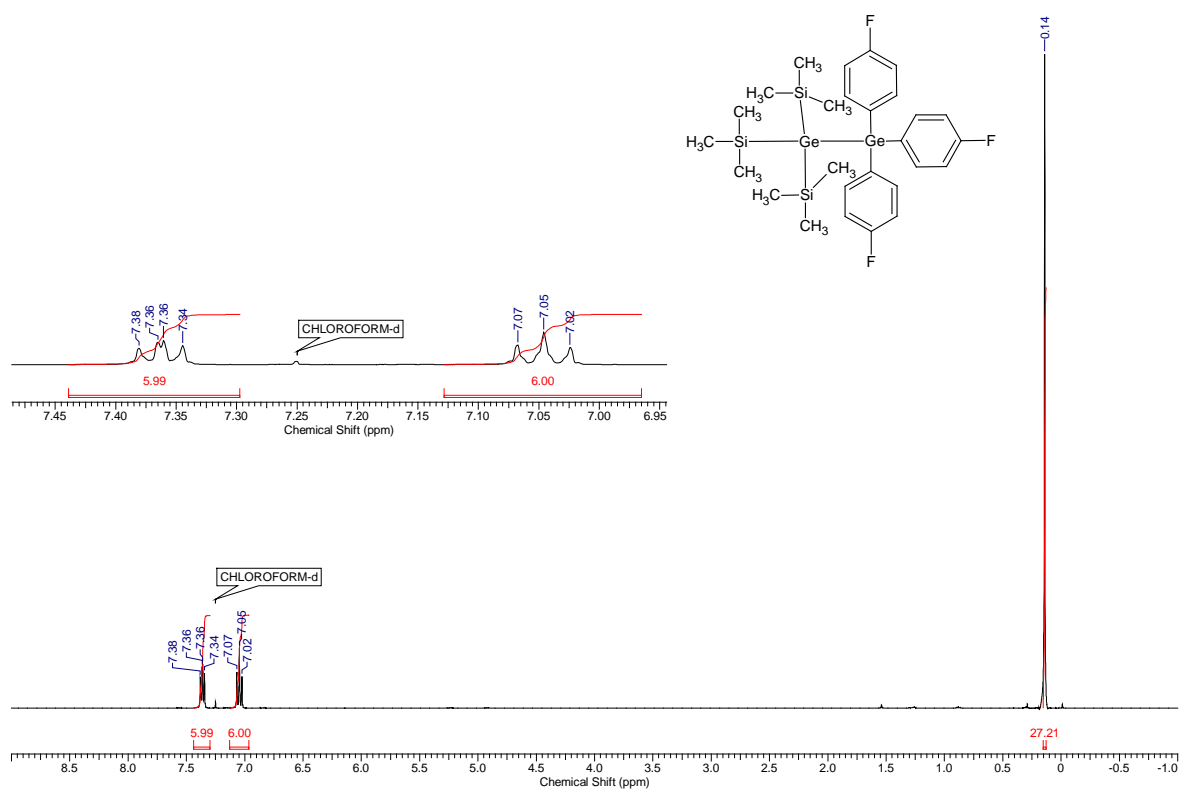

**Fig. S4.**  $^1\text{H}$  NMR spectrum of  $(\text{Me}_3\text{Si})_3\text{Ge}-\text{Ge}(p\text{-C}_6\text{H}_4\text{F})_3$  (2) ( $\text{CDCl}_3$ , RT).

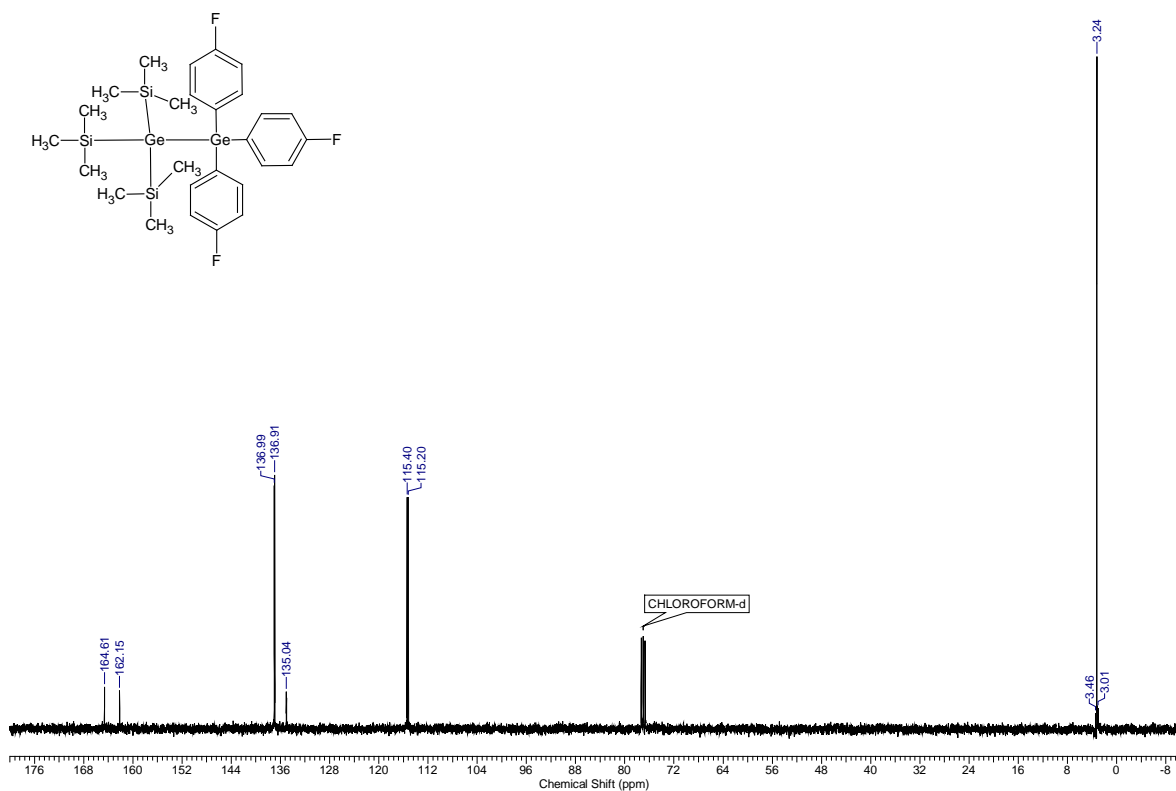

**Fig. S5.**  $^{13}\text{C}$  NMR spectrum of  $(\text{Me}_3\text{Si})_3\text{Ge}-\text{Ge}(\text{p-C}_6\text{H}_4\text{F})_3$  (2) ( $\text{CDCl}_3$ , RT).

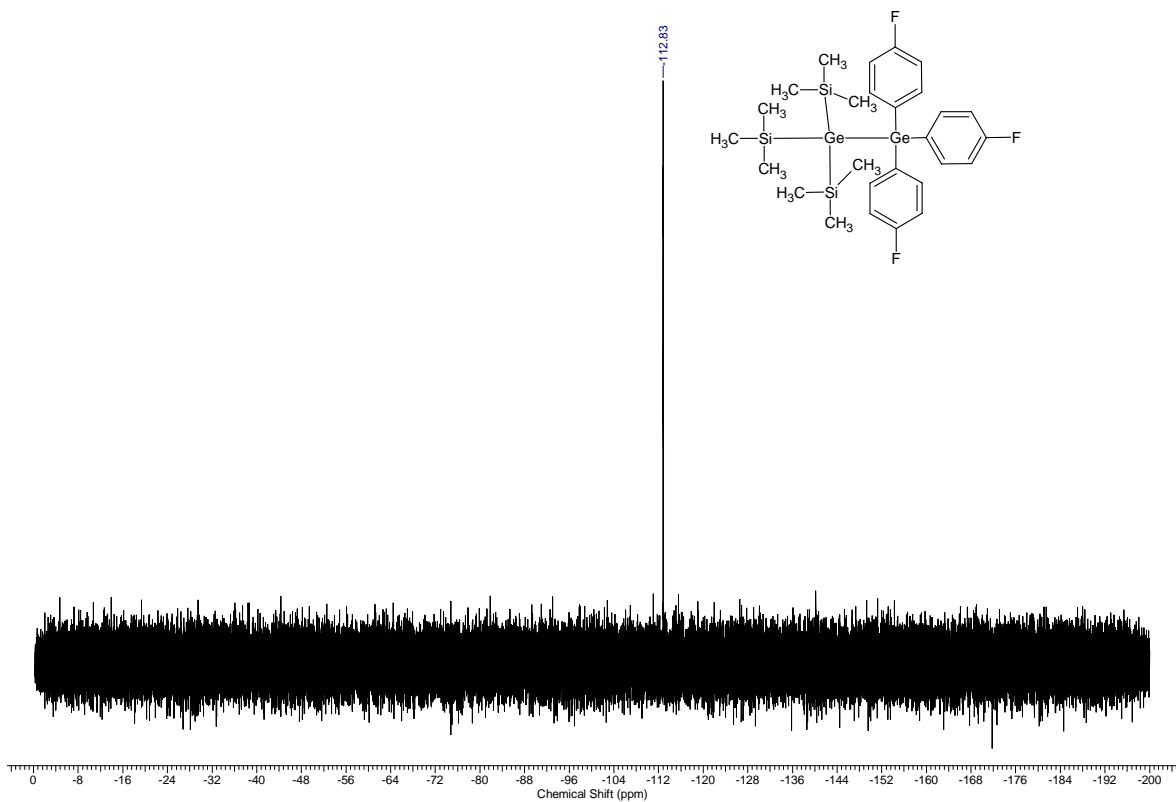

**Fig. S6.**  $^{19}\text{F}$  NMR spectrum of  $(\text{Me}_3\text{Si})_3\text{Ge}-\text{Ge}(\text{p-C}_6\text{H}_4\text{F})_3$  (2) ( $\text{CDCl}_3$ , RT).

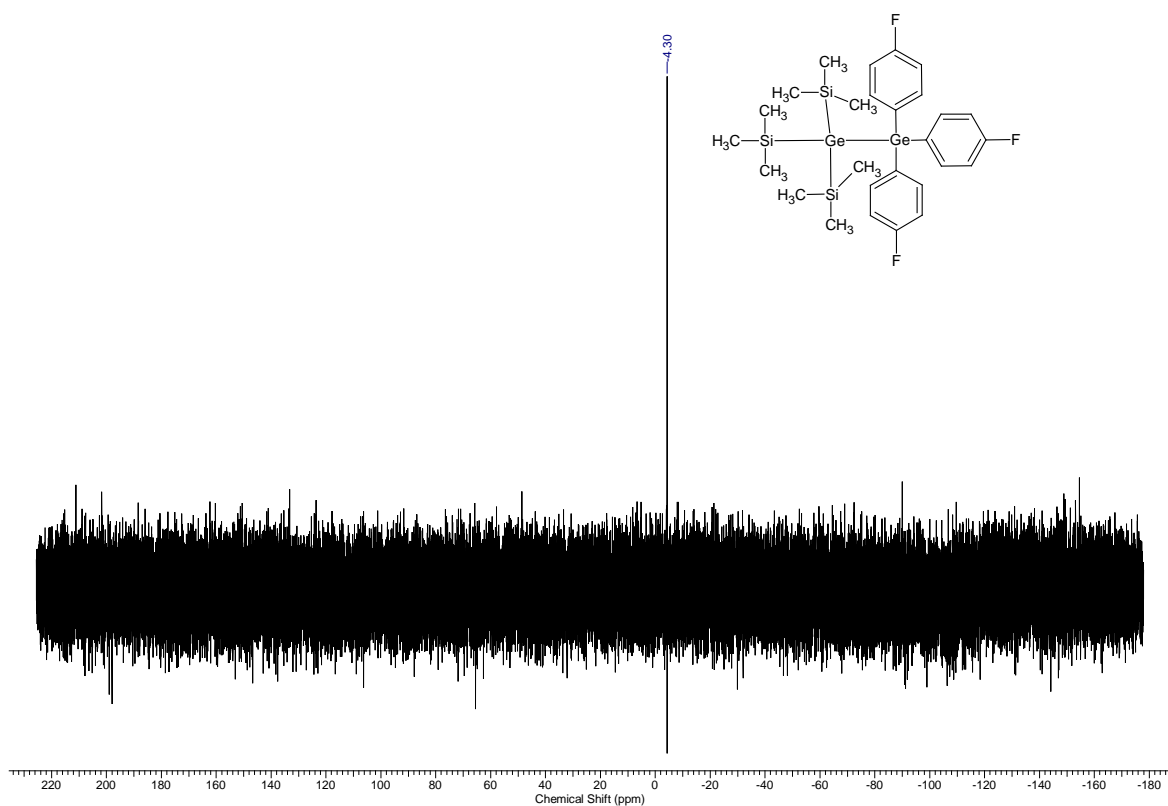

**Fig. S7.**  $^{29}\text{Si}$  NMR spectrum of  $(\text{Me}_3\text{Si})_3\text{Ge}-\text{Ge}(\text{p-C}_6\text{H}_4\text{F})_3$  (**2**) ( $\text{CDCl}_3$ , RT).

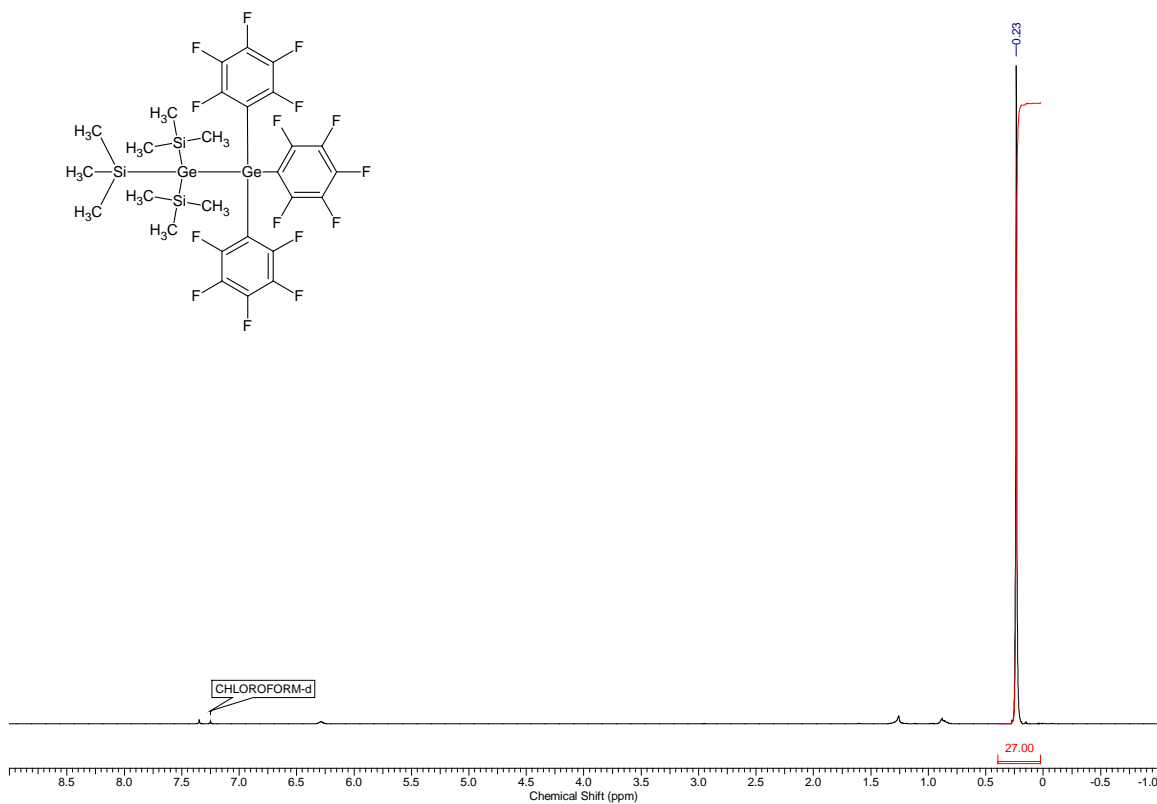

**Fig. S8.**  $^1\text{H}$  NMR spectrum of  $(\text{Me}_3\text{Si})_3\text{Ge}-\text{Ge}(\text{C}_6\text{F}_5)_3$  (**3**) ( $\text{CDCl}_3$ , RT).

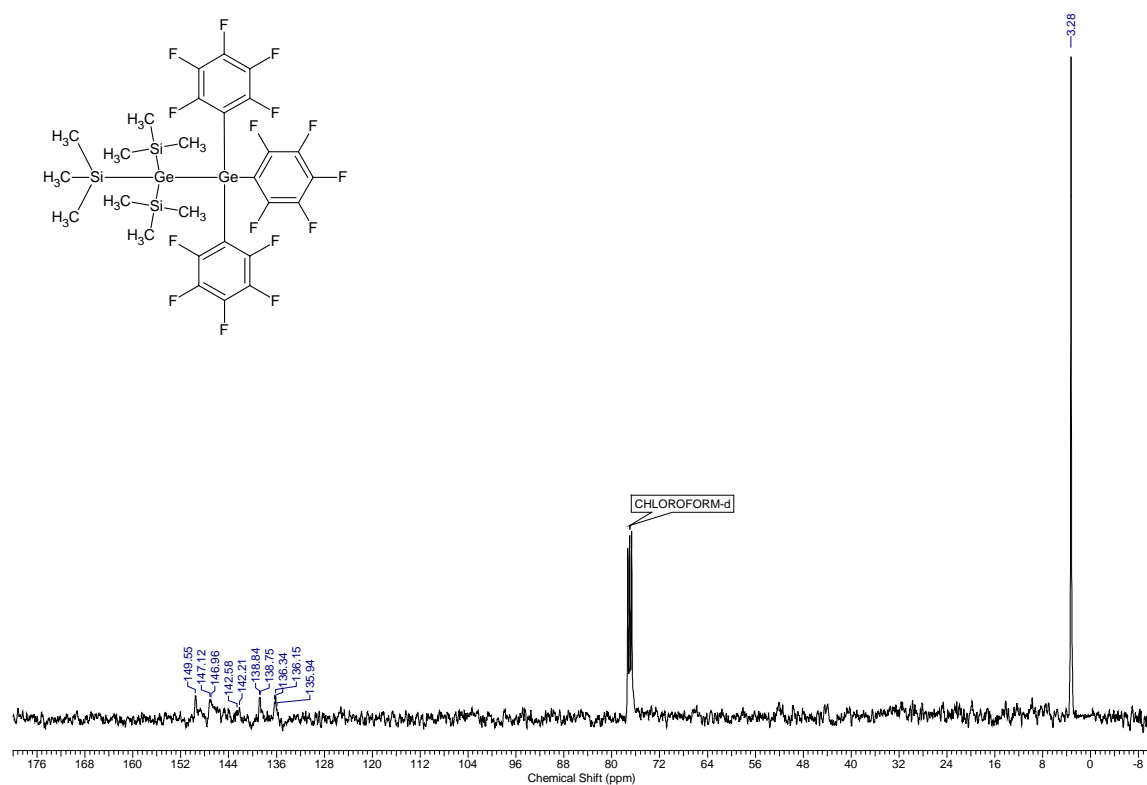

**Fig. S9.**  $^{13}\text{C}$  NMR spectrum of  $(\text{Me}_3\text{Si})_3\text{Ge}-\text{Ge}(\text{C}_6\text{F}_5)_3$  (3) ( $\text{CDCl}_3$ , RT).

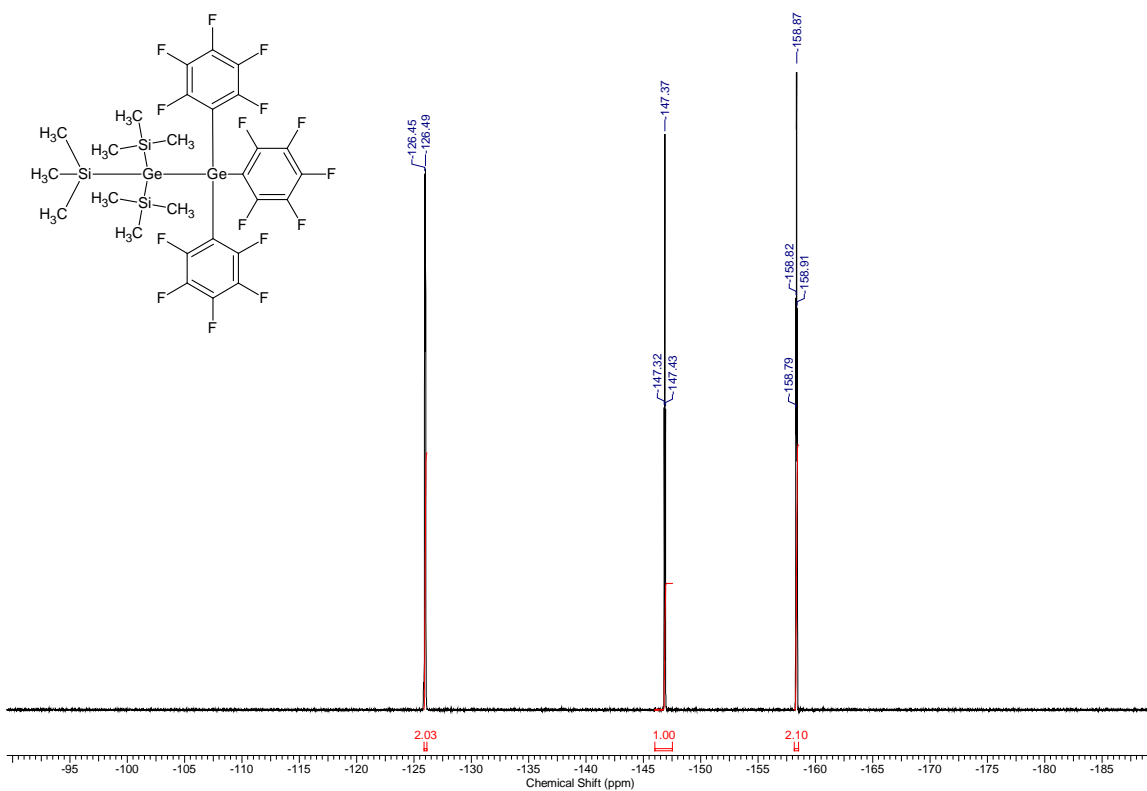

**Fig. S10.**  $^{19}\text{F}$  NMR spectrum of  $(\text{Me}_3\text{Si})_3\text{Ge}-\text{Ge}(\text{C}_6\text{F}_5)_3$  (3) ( $\text{CDCl}_3$ , RT).

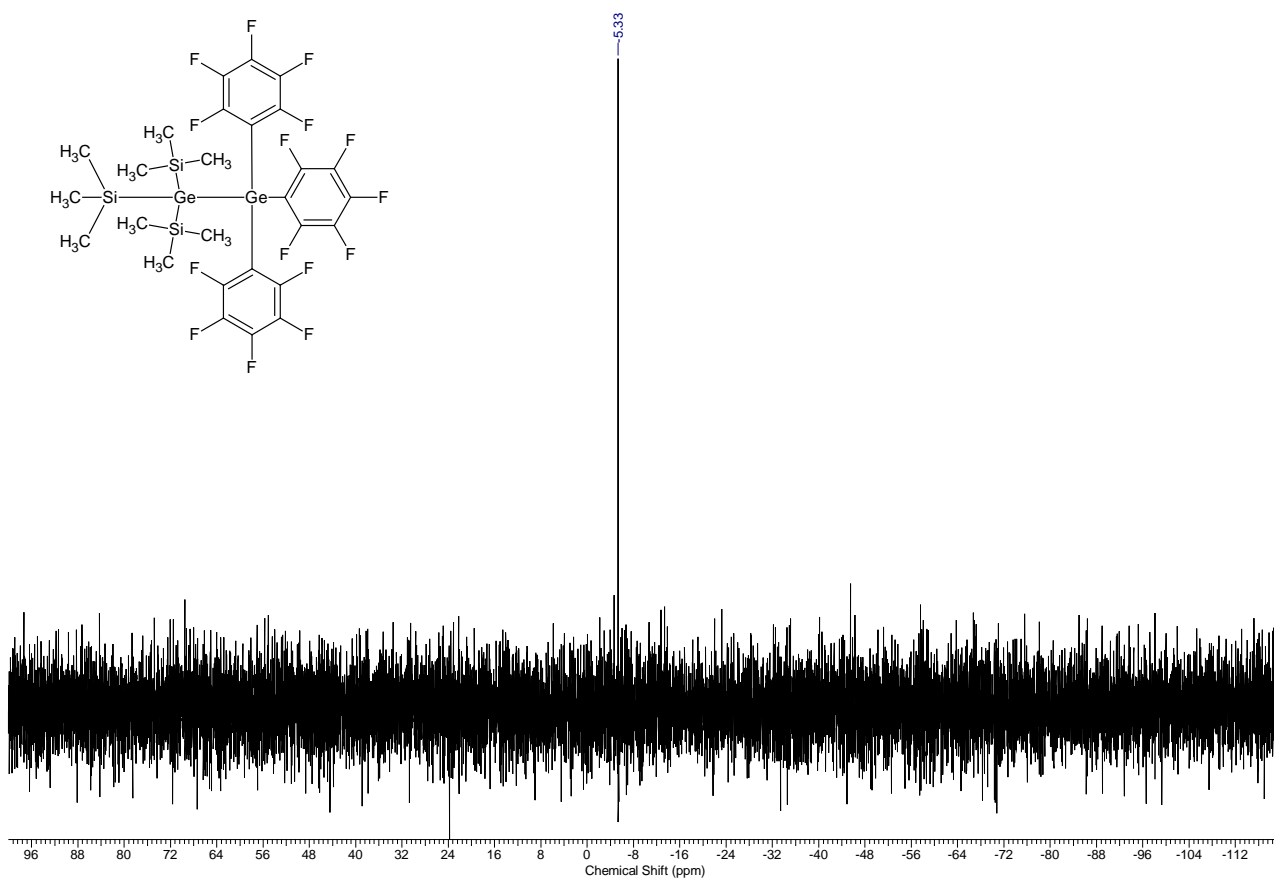

**Fig. S11.**  $^{29}\text{Si}$  NMR spectrum of  $(\text{Me}_3\text{Si})_3\text{Ge}-\text{Ge}(\text{C}_6\text{F}_5)_3$  (**3**) ( $\text{CDCl}_3$ , RT).

UV/vis Absorption Spectra of the Compounds Obtained

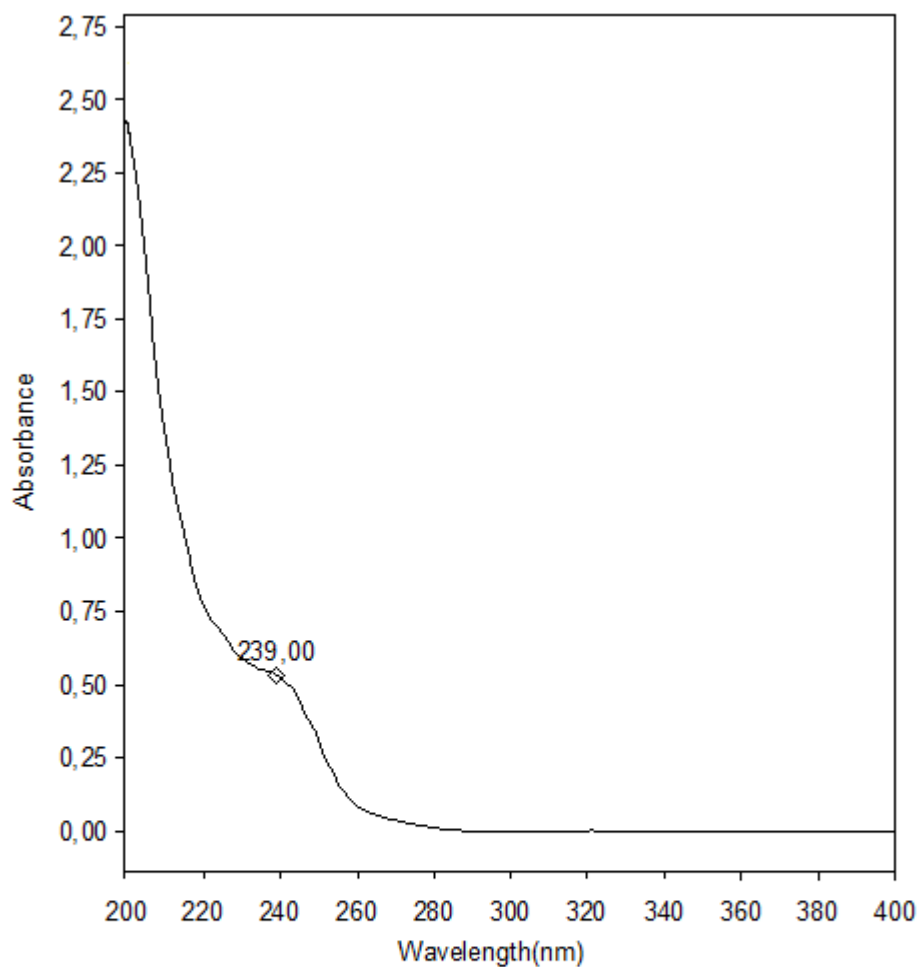

Batch : mar 4 C6H14 01 cm\_03.sre

|   | A                | B  | C      | D | E | F |
|---|------------------|----|--------|---|---|---|
| 1 | mar 4 C6H14 01 c |    | 1      |   |   |   |
| 2 | Cycle01          | nm | 239,00 |   |   |   |
| 3 | Manual           | A  | 0,534  |   |   |   |
| 4 |                  |    |        |   |   |   |
| 5 |                  |    |        |   |   |   |

**Fig. S12.** UV/vis Absorption Spectrum of  $(\text{Me}_3\text{Si})_3\text{Ge-Ge}(\text{C}_6\text{H}_4\text{Me-}p)_3$  (**1**) (*n*-hexane, RT).

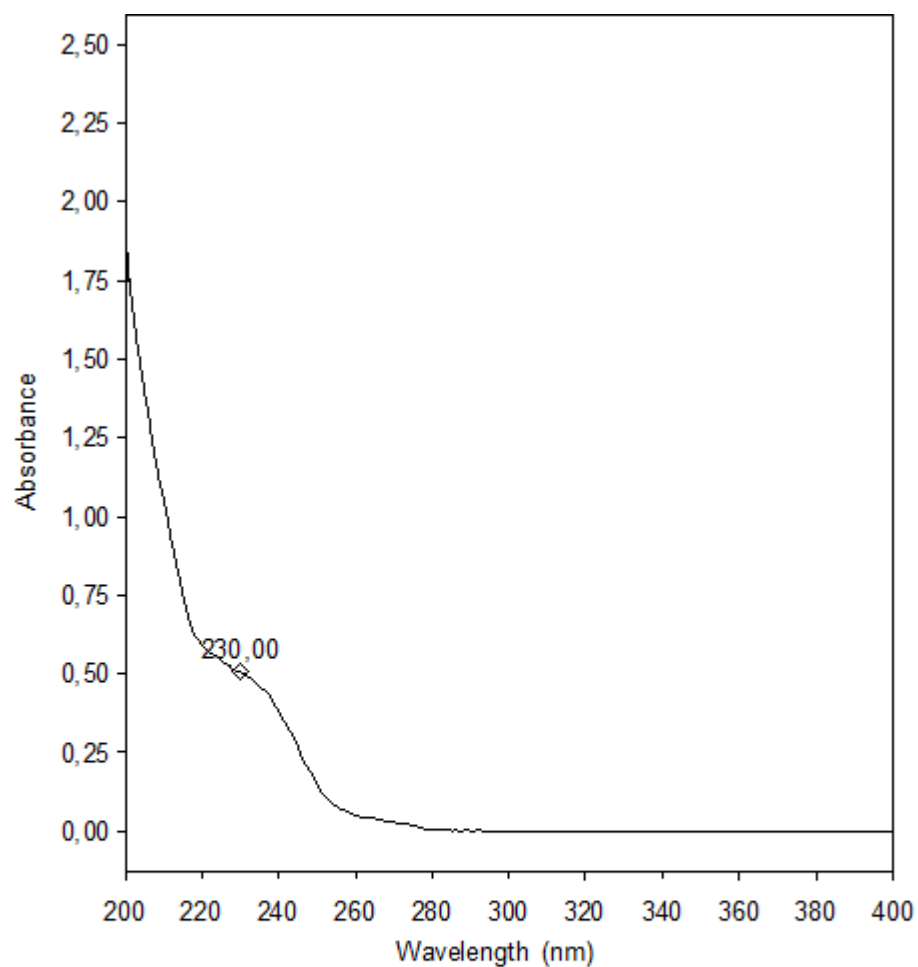

Batch : mar 5 C6H14 01 cm.sre

|   | A                | B  | C      | D | E | F |
|---|------------------|----|--------|---|---|---|
| 1 | mar 5 C6H14 01 c |    | 1      |   |   |   |
| 2 | Cycle01          | nm | 230,00 |   |   |   |
| 3 | Manual           | A  | 0,505  |   |   |   |
| 4 |                  |    |        |   |   |   |
| 5 |                  |    |        |   |   |   |

**Fig. S13.** UV/vis Absorption Spectrum of  $(\text{Me}_3\text{Si})_3\text{Ge-Ge}(p\text{-C}_6\text{H}_4\text{F})_3$  (**2**) (*n*-hexane, RT).

**Data of the Single Crystal X-ray Diffraction Analysis**

**Table S1.** Crystallographic data for complex (Me<sub>3</sub>Si)<sub>3</sub>Ge-Ge(C<sub>6</sub>H<sub>4</sub>Me-*p*)<sub>3</sub> (**1**) and (Me<sub>3</sub>Si)<sub>3</sub>Ge-Ge(C<sub>6</sub>H<sub>4</sub>F-*p*)<sub>3</sub> (**2**).

|                                                       | (Me <sub>3</sub> Si) <sub>3</sub> Ge-Ge(C <sub>6</sub> H <sub>4</sub> Me- <i>p</i> ) <sub>3</sub> ( <b>1</b> ) | (Me <sub>3</sub> Si) <sub>3</sub> Ge-Ge( <i>p</i> -C <sub>6</sub> H <sub>4</sub> F) <sub>3</sub> ( <b>2</b> ) |
|-------------------------------------------------------|----------------------------------------------------------------------------------------------------------------|---------------------------------------------------------------------------------------------------------------|
| formula                                               | C <sub>30</sub> H <sub>48</sub> Ge <sub>2</sub> Si <sub>3</sub>                                                | C <sub>27</sub> H <sub>39</sub> F <sub>3</sub> Ge <sub>2</sub> Si <sub>3</sub>                                |
| $M_w$                                                 | 638.13                                                                                                         | 650.03                                                                                                        |
| temperature (K)                                       | 150(2)                                                                                                         | 120(2)                                                                                                        |
| size (mm)                                             | 0.25 x 0.20 x 0.06                                                                                             | 0.24 x 0.20 x 0.18                                                                                            |
| crystal system                                        | triclinic                                                                                                      | triclinic                                                                                                     |
| space group                                           | <i>P</i> -1                                                                                                    | <i>P</i> -1                                                                                                   |
| <i>a</i> (Å)                                          | 10.3142(5)                                                                                                     | 12.6869(9)                                                                                                    |
| <i>b</i> (Å)                                          | 12.5268(6)                                                                                                     | 16.0638(11)                                                                                                   |
| <i>c</i> (Å)                                          | 14.3782(7)                                                                                                     | 16.0959(11)                                                                                                   |
| $\alpha$ (deg)                                        | 92.799(1)                                                                                                      | 86.839(1)                                                                                                     |
| $\beta$ (deg)                                         | 99.352(1)                                                                                                      | 86.299(1)                                                                                                     |
| $\gamma$ (deg)                                        | 110.923(1)                                                                                                     | 81.912(1)                                                                                                     |
| <i>V</i> (Å <sup>3</sup> )                            | 1700.61(14)                                                                                                    | 3237.4(4)                                                                                                     |
| <i>Z</i>                                              | 2                                                                                                              | 4                                                                                                             |
| $P_{\text{calcd}}$ (g*cm <sup>-3</sup> )              | 1.246                                                                                                          | 1.334                                                                                                         |
| abs. coeff. $\mu$ (MoK $\alpha$ ) (mm <sup>-1</sup> ) | 1.889                                                                                                          | 1.999                                                                                                         |
| <i>F</i> (000)                                        | 668                                                                                                            | 1336                                                                                                          |
| $\theta$ range (deg)                                  | 2.22 – 28.00                                                                                                   | 1.76 – 29.00                                                                                                  |
| no. of collected/unique rflns.                        | 17699 / 8197                                                                                                   | 36739 / 17152                                                                                                 |
| $R_{\text{int}}$                                      | 0.0147                                                                                                         | 0.0202                                                                                                        |
| data/restraints/parameters                            | 8197 / 0 / 329                                                                                                 | 17152 / 0 / 649                                                                                               |
| goodness of fit on $F^2$                              | 1.030                                                                                                          | 1.052                                                                                                         |
| final <i>R</i> indices ( $I > 2\sigma(I)$ )           | $R_1 = 0.0219,$<br>$wR_2 = 0.0583$                                                                             | $R_1 = 0.0273,$<br>$wR_2 = 0.0630$                                                                            |
| <i>R</i> indices (all data)                           | $R_1 = 0.0264,$<br>$wR_2 = 0.0603$                                                                             | $R_1 = 0.0415,$<br>$wR_2 = 0.0671$                                                                            |
| largest diff. peak/hole (e/Å <sup>3</sup> )           | -0.203 / 0.440                                                                                                 | -0.285 / 0.377                                                                                                |

Data of DFT calculations

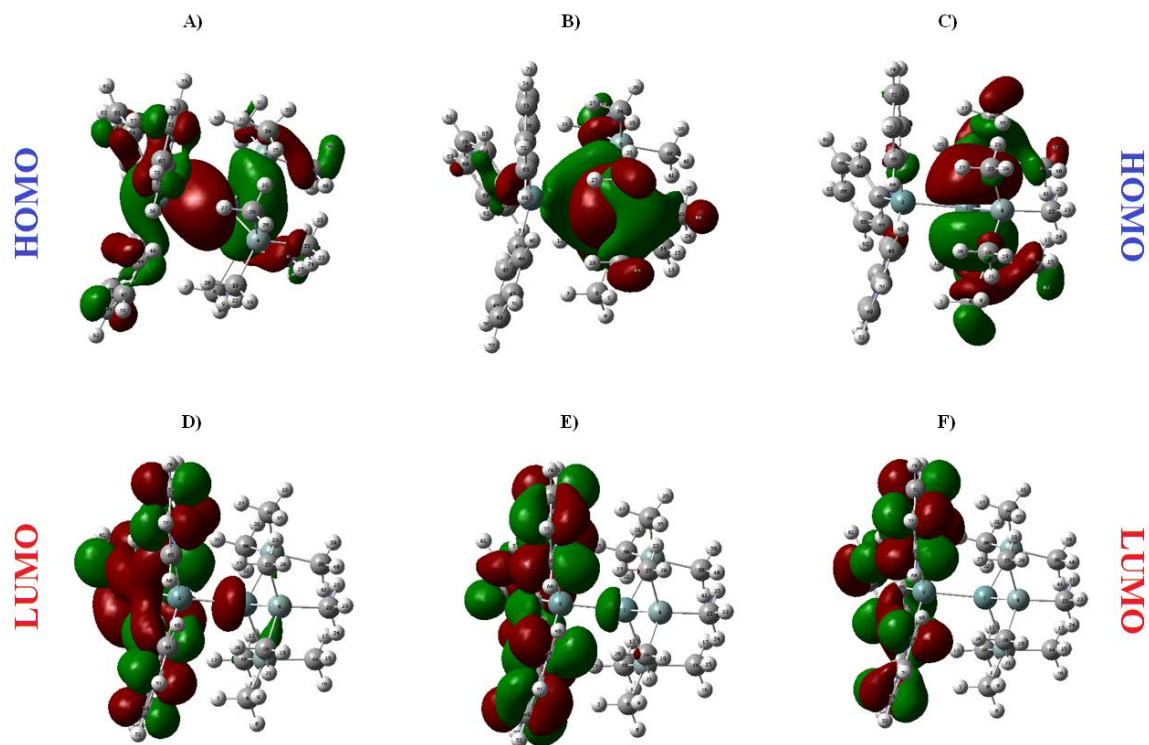

**Fig. S14.** Graphical representation of HOMO (A), HOMO-1 (B), HOMO-2 (C), LUMO (D), LUMO+1 (E), LUMO+2 (F) for compound (Me<sub>3</sub>Si)<sub>3</sub>Ge-GePh<sub>3</sub>.
